# Supplementary material for: Single-step chromatographic isolation of lithium from whole-rock carbonate and clay for isotopic analysis with multi-collector ICP-mass spectrometry
Source: Royal Society of Chemistry journal article supplement (doi:10.1039/c5ja00165j), 2015-01-01
Supplement: c5ja00165j1.pdf [file c5ja00165j1.pdf]

# Single-step chromatographic isolation of lithium from whole-rock carbonate and clay for isotopic analysis with multi-collector ICP-mass spectrometry

K. Van Hoecke, J. Belza, T. Croymans, S. Misra, P. Claeys, F. Vanhaecke

## Supporting Information

### Na and Ca contamination in 6 M HCl eluent solution during resin cleaning

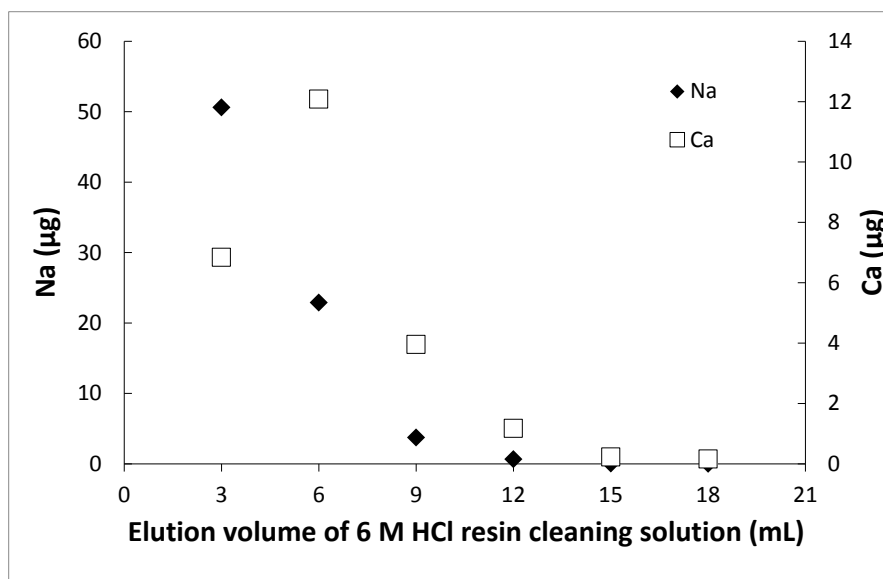

Figure S1 - Na and Ca concentration as a function of 6M HCl resin cleaning eluent volume in 3 mL columns.

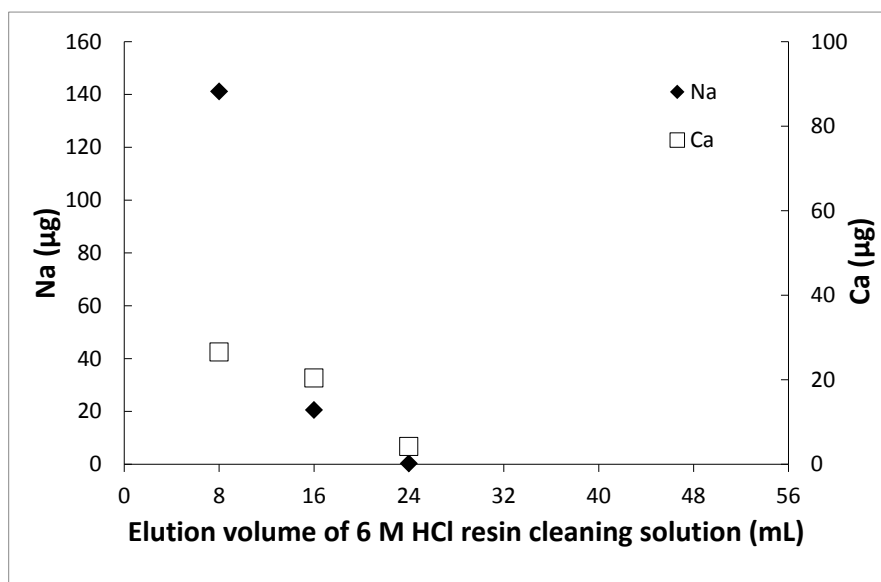

**Figure S2 - Na and Ca concentration as a function of 6M HCl resin cleaning eluent volume in 8 mL columns.**
